# Supplementary material for: Evolution of urban scaling: Evidence from Brazil
Source: PubMed Central journal article supplement (PMC6171854; doi:10.1371/journal.pone.0204574), 2018-10-04
Supplement: pone.0204574.s001.pdf [file pone.0204574.s001.pdf]

## Supporting information

**S1 Table Studied variables.** Description of the studied variables containing units, expected scaling regime [10] and source.

| Variable                                       | Unit      | Scaling Regime | Source      |
|------------------------------------------------|-----------|----------------|-------------|
| Population                                     | number    | base           | IBGE/census |
| Surface of Administrative Area                 | Km2       | infrastructure | IBGE/census |
| Gross Domestic Product                         | R\$       | social output  | IPEA        |
| Length of Street Network                       | Km        | infrastructure | OSM         |
| Number of Health Facilities                    | number    | infrastructure | IBGE/cities |
| numberOfHospitalBeds                           | number    | infrastructure | IBGE/cities |
| numberOfDaycareFacilities                      | number    | infrastructure | IBGE/cities |
| numberOfPrimarySchools                         | number    | infrastructure | IBGE/cities |
| numberOfSecondarySchools                       | number    | infrastructure | IBGE/cities |
| numberOfNonGovernmentalOrganizations           | number    | social output  | IBGE/cities |
| numberOfCommercialEnterprises                  | number    | infrastructure | IBGE/cities |
| numberOfCommercialEnterprisesFacility          | number    | infrastructure | IBGE/cities |
| numberOfDeathsByTrafficAccident                | number    | social output  | DATASUS     |
| numberOfHomicides                              | number    | social output  | DATASUS     |
| numberOfSuicides                               | number    | social output  | DATASUS     |
| currentExpenditure                             | R\$       | infrastructure | IPEA        |
| subsidyExpenditure                             | R\$       | infrastructure | IPEA        |
| capitalExpenditure                             | R\$       | infrastructure | IPEA        |
| budgetedExpenditure                            | R\$       | infrastructure | IPEA        |
| expenditureByFunction                          | R\$       | infrastructure | IPEA        |
| Transfer Expenditure                           | R\$       | social output  | IPEA        |
| budgetedRevenue                                | R\$       | social output  | IPEA        |
| currentRevenue                                 | R\$       | social output  | IPEA        |
| taxRevenue                                     | R\$       | social output  | IPEA        |
| capitalRevenue                                 | R\$       | social output  | IPEA        |
| taxRevenueTaxes/taxes                          | R\$       | social output  | IPEA        |
| taxRevenueUrbanLandTax                         | R\$       | social output  | IPEA        |
| taxRevenueServiceTax                           | R\$       | social output  | IPEA        |
| taxRevenueTax- Rates                           | R\$       | social output  | IPEA        |
| numberOfRegisteredInhabitants                  | number    | social output  | IBGE/census |
| numberOfLiterateInhabitants                    | number    | social output  | IBGE/census |
| numberOfHousesWithBathroom                     | number    | base           | IBGE/census |
| numberOfHousesConnectedToSewageSystem          | number    | base           | IBGE/census |
| numberOfInhabitantsWithMunicipalWaterSupply    | number    | base           | IBGE/census |
| numberOfInhabitantsServedByWasteCollection     | number    | base           | IBGE/census |
| numberOfInhabitantsWithAccessToElectricity     | number    | base           | IBGE/census |
| numberOfInhabitantsWithExclusiveBathroom       | number    | base           | IBGE/census |
| numberOfInhabitantsWithElectricityMeasurement  | number    | base           | IBGE/census |
| numberOfInhabitantsWithWasteIllegalDumping     | number    | base           | IBGE/census |
| numberOfInhabitantsWithWasteIllegalBurning     | number    | base           | IBGE/census |
| Water and Sewage systems/Total revenue         | R\$       | infrastructure | SNIS        |
| Water and Sewage systems/Total expenditures    | R\$       | infrastructure | SNIS        |
| Water and Sewage systems/Staff expenditures    | R\$       | infrastructure | SNIS        |
| Population with water supply                   | number    | infrastructure | SNIS        |
| Water supply network/links                     | number    | infrastructure | SNIS        |
| Water supply network/length                    | Km        | infrastructure | SNIS        |
| Water supply/electricity consumption           | KhH/year  | infrastructure | SNIS        |
| Water supply/investments                       | R\$/year  | infrastructure | SNIS        |
| Water supply/impacted consumers shutdowns      | number    | infrastructure | SNIS        |
| Population with sewage collection              | number    | base           | SNIS        |
| Sewage collection network/links                | number    | infrastructure | SNIS        |
| Sewage collection network/length               | Km        | infrastructure | SNIS        |
| Sewage collection/collected volume             | km3/year  | base           | SNIS        |
| Sewage collection/wastewater analyzed samples  | number    | infrastructure | SNIS        |
| Waste collection/attended population           | number    | base           | SNIS        |
| Waste collection/associated garbage collectors | number    | infrastructure | SNIS        |
| Waste collection/waste collected               | Tons/year | base           | SNIS        |
| Waste collection/waste trucks                  | number    | infrastructure | SNIS        |
| Waste collection/total expenditures            |           | infrastructure | SNIS        |
| Waste collection/total workers                 | number    | infrastructure | SNIS        |
| Waste collection/swept sidewalks               | Km        | social output  | SNIS        |
