# Supplementary material for: Evolution of urban scaling: Evidence from Brazil
Source: PubMed Central journal article supplement (PMC6171854; doi:10.1371/journal.pone.0204574), 2018-10-04

**S1 Fig** Scaling exponent  $\beta$  as a function of minimum density cut-off for all the variables. Each line represents the scaling exponent (y-axis) from OLS regressions of the log-transformed data of each variable as a function of the minimum density cut-off (x-axis).

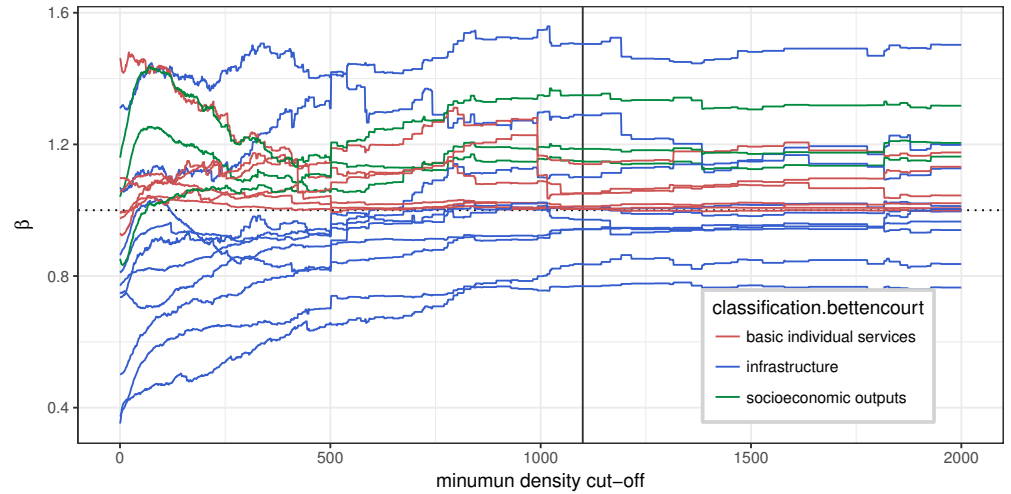

Supplement: pone.0204574.s002.pdf [file pone.0204574.s002.pdf]
