# Supplementary material for: Evolution of urban scaling: Evidence from Brazil
Source: PubMed Central journal article supplement (PMC6171854; doi:10.1371/journal.pone.0204574), 2018-10-04

**S2 Fig Exponents values for different urban indicators in the Brazilian urban system.** Each dot represents the scaling exponent related to the best-fit line from the OLS regression of the population against the studied variable; vertical line segments represent 95% confidence interval (CI) of those regressions; colors are based on the proposed regime; the horizontal black-dotted line indicates linear relationship.

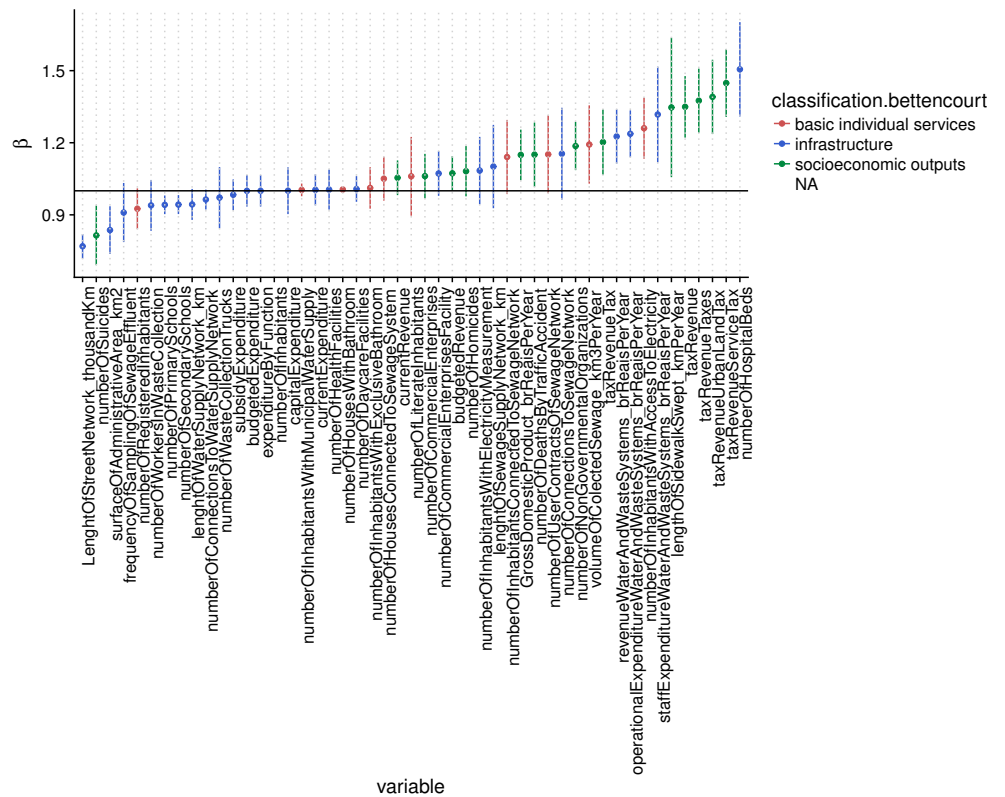

Supplement: pone.0204574.s003.pdf [file pone.0204574.s003.pdf]
