# Supplementary material for: Evolution of urban scaling: Evidence from Brazil
Source: PubMed Central journal article supplement (PMC6171854; doi:10.1371/journal.pone.0204574), 2018-10-04
Supplement: pone.0204574.s004.pdf [file pone.0204574.s004.pdf]

**S2 Table** Deviations from the expected scaling regime proposed by Bettencourt [10] for all the statistically significant variables.. Values for  $\beta$ , and its 95% confidence interval refers to the final density cut-off value. Statistically insignificant variables are not presented.

| Variable                                      | $\beta$              | Deviation |
|-----------------------------------------------|----------------------|-----------|
| LenghtOfStreetNetwork                         | 0.77 [ 0.72 , 0.82 ] |           |
| numberOfSuicides                              | 0.81 [ 0.69 , 0.94 ] |           |
| surfaceOfAdministrativeArea                   | 0.84 [ 0.74 , 0.94 ] |           |
| frequencyOfSamplingOfSewageEffluent           | 0.91 [ 0.79 , 1.03 ] |           |
| numberOfRegisteredInhabitants                 | 0.93 [ 0.84 , 1.01 ] | X         |
| numberOfWorkersInWasteCollection              | 0.94 [ 0.83 , 1.05 ] |           |
| numberOfPrimarySchools                        | 0.94 [ 0.90 , 0.98 ] |           |
| numberOfSecondarySchools                      | 0.94 [ 0.90 , 0.98 ] |           |
| lenghtOfWaterSupplyNetwork_km                 | 0.94 [ 0.88 , 1.01 ] |           |
| numberOfConnectionsToWaterSupplyNetwork       | 0.96 [ 0.92 , 1.00 ] |           |
| numberOfWasteCollectionTrucks                 | 0.97 [ 0.84 , 1.10 ] |           |
| subsidyExpenditure                            | 0.98 [ 0.92 , 1.05 ] | X         |
| budgetedExpenditure                           | 1.00 [ 0.93 , 1.07 ] | X         |
| expenditureByFunction                         | 1.00 [ 0.93 , 1.07 ] | X         |
| capitalExpenditure                            | 1.00 [ 0.90 , 1.10 ] | X         |
| numberOfInhabitantsWithMunicipalWaterSupply   | 1.00 [ 0.98 , 1.03 ] |           |
| currentExpenditure                            | 1.00 [ 0.94 , 1.07 ] | X         |
| numberOfHealthFacilities                      | 1.01 [ 0.92 , 1.09 ] | X         |
| numberOfHousesWithBathroom                    | 1.01 [ 0.99 , 1.02 ] |           |
| numberOfDaycareFacilities                     | 1.01 [ 0.95 , 1.06 ] | X         |
| numberOfInhabitantsWithExclusiveBathroom      | 1.01 [ 0.93 , 1.10 ] |           |
| numberOfHousesConnectedToSewageSystem         | 1.05 [ 0.96 , 1.14 ] | X         |
| currentRevenue                                | 1.05 [ 0.98 , 1.13 ] |           |
| numberOfLiterateInhabitants                   | 1.06 [ 0.90 , 1.22 ] |           |
| numberOfCommercialEnterprises                 | 1.06 [ 0.97 , 1.15 ] |           |
| numberOfCommercialEnterprisesFacility         | 1.07 [ 0.98 , 1.16 ] | X         |
| budgetedRevenue                               | 1.07 [ 1.00 , 1.14 ] |           |
| numberOfHomicides                             | 1.08 [ 0.98 , 1.19 ] |           |
| numberOfInhabitantsWithElectricityMeasurement | 1.08 [ 0.94 , 1.22 ] | X         |
| lenghtOfSewageSupplyNetwork                   | 1.10 [ 0.93 , 1.27 ] | X         |
| numberOfInhabitantsServedByWasteCollection    | 1.12 [ 1.04 , 1.19 ] | X         |
| numberOfInhabitantsConnectedToSewageNetwork   | 1.14 [ 0.99 , 1.30 ] | X         |
| GrossDomesticProduct                          | 1.15 [ 1.04 , 1.25 ] |           |
| numberOfDeathsByTrafficAccident               | 1.15 [ 1.02 , 1.28 ] |           |
| numberOfUserContractsOfSewageNetwork          | 1.15 [ 0.99 , 1.31 ] | X         |
| numberOfConnectionsToSewageNetwork            | 1.15 [ 0.96 , 1.35 ] | X         |
| numberOfNonGovernmentalOrganizations          | 1.19 [ 1.09 , 1.29 ] |           |
| volumeOfCollectedSewage                       | 1.19 [ 1.03 , 1.36 ] | X         |
| taxRevenueTax                                 | 1.20 [ 1.07 , 1.34 ] |           |
| revenueWaterAndWasteSystems                   | 1.23 [ 1.11 , 1.34 ] |           |
| operationalExpenditureWaterAndWasteSystems    | 1.24 [ 1.14 , 1.33 ] | X         |
| numberOfInhabitantsWithAccessToElectricity    | 1.26 [ 1.13 , 1.39 ] | X         |
| staffExpenditureWaterAndWasteSystems          | 1.32 [ 1.12 , 1.52 ] | X         |
| lengthOfSidewalkSwept                         | 1.35 [ 1.06 , 1.64 ] |           |
| taxRevenue                                    | 1.35 [ 1.22 , 1.48 ] |           |
| taxRevenueTaxes                               | 1.38 [ 1.24 , 1.51 ] |           |
| taxRevenueUrbanLandTax                        | 1.39 [ 1.24 , 1.55 ] |           |
| taxRevenueServiceTax                          | 1.45 [ 1.31 , 1.59 ] |           |
| numberOfHospitalBeds                          | 1.51 [ 1.31 , 1.70 ] | X         |
